# Supplementary material
Source: HighWire-hosted journal article supplement (https://bmjopen.bmj.com/content/9/5/e027323)
Supplement: inline-supplementary-material-1 [file inline-supplementary-material-1.pdf]

## Appendix 1

No studies were excluded following the quality assessment (Table 3).

### *Quality assessment scores for included papers*

| Source Paper<br>(n=12)     | Title of paper                                                                                                      | Abstract/Title                                   | Intro/<br>Aims | Method/<br>Data           | Sampling                       | Data<br>Analysis | Ethics/<br>Bias | Results | Transferability | Implications               | Quality<br>score (out of<br>36) |
|----------------------------|---------------------------------------------------------------------------------------------------------------------|--------------------------------------------------|----------------|---------------------------|--------------------------------|------------------|-----------------|---------|-----------------|----------------------------|---------------------------------|
| <b>Leydon<br/>(2013)</b>   | Discontinuity of care at end of life: a qualitative exploration of out of hours end of life care                    | 4                                                | 4              | 4                         | 4                              | 4                | 3               | 4       | 4               | 3                          | 34/36                           |
| <b>Seamark<br/>(2014)</b>  | Dying at home:<br><br>a qualitative study of family carers' views of support provided<br><br>by GPs community staff | 3 – method of data analysis absent from abstract | 3              | 3                         | 4                              | 4                | 3               | 4       | 4               | 4                          | 32/36                           |
| <b>Payne (2017)</b>        | Enhancing integrated palliative care: what models are appropriate? A cross-case analysis                            | 3                                                | 4              | 4                         | 3 – no response rates reported | 4                | 4               | 4       | 3               | 4                          | 33/36                           |
| <b>Richards<br/>(2011)</b> | The experiences and needs of people seeking palliative health care out-of-hours: a qualitative study                | 4                                                | 4              | 3 – schedule not included | 4-                             | 4                | 4               | 4       | 4               | 3- future research missing | 34/36                           |
| <b>Klarare<br/>(2017)</b>  | Experiences of security and continuity of care:                                                                     | 4                                                | 4              | 3                         | 3                              | 4                | 4               | 4       | 4               | 4                          | 34/36                           |

|                          |                                                                                                                                                                                |   |                             |   |   |   |   |   |   |                                          |       |
|--------------------------|--------------------------------------------------------------------------------------------------------------------------------------------------------------------------------|---|-----------------------------|---|---|---|---|---|---|------------------------------------------|-------|
|                          | Patients' and families' narratives about the work of specialized palliative home care teams                                                                                    |   |                             |   |   |   |   |   |   |                                          |       |
| <b>Bailey (2016)</b>     | Hospital care following emergency admission: a critical incident case study of the experiences of patients with advanced lung cancer and Chronic Obstructive Pulmonary Disease | 4 | 4                           | 4 | 4 | 4 | 4 | 4 | 3 | 4                                        | 35/36 |
| <b>McLaughlin (2010)</b> | Living and coping with Parkinson's disease: Perceptions of informal carers                                                                                                     | 4 | 3                           | 2 | 2 | 3 | 3 | 4 | 3 | 3 implications for practice not outlined | 24/36 |
| <b>Neergaard (2008)</b>  | Palliative care for cancer patients in a primary health care setting: Bereaved relatives' experience, a qualitative group interview study                                      | 3 | 3 – brief literature review | 4 | 4 | 4 | 2 | 4 | 3 | 4                                        | 31/36 |
| <b>Browne (2014)</b>     | Patient, Carer and Professional Perspectives on Barriers and Facilitators to Quality Care in Advanced Heart Failure                                                            | 4 | 3                           | 4 | 3 | 3 | 3 | 4 | 3 | 3 – no future research recommendations   | 30/36 |
| <b>Jack (2016)</b>       | Supporting older people with cancer and life-limiting conditions dying                                                                                                         | 4 | 4                           | 3 | 3 | 4 | 4 | 4 | 3 | 4                                        | 29/36 |

|                          |                                                                                                                                                                                  |   |   |   |                                         |   |   |   |   |                                                                   |       |
|--------------------------|----------------------------------------------------------------------------------------------------------------------------------------------------------------------------------|---|---|---|-----------------------------------------|---|---|---|---|-------------------------------------------------------------------|-------|
|                          | at home: a qualitative study of patient and family caregiver experiences of Hospice at Home care                                                                                 |   |   |   |                                         |   |   |   |   |                                                                   |       |
| <b>Adam (2015)</b>       | Utilising out-of-hours primary care for assistance with cancer pain: a semi-structured interview study of patient and caregiver experiences                                      | 4 | 3 | 4 | 4                                       | 4 | 3 | 4 | 4 | 4                                                                 | 34/36 |
| <b>Mortel (2017)</b>     | Reducing avoidable admissions in rural community palliative care: a pilot study of care coordination by General Practice registrars.                                             | 4 | 4 | 4 | 3                                       | 4 | 4 | 4 | 3 | 3                                                                 | 33/36 |
| <b>Ingadottir (2010)</b> | Partnership-based nursing practice for people with chronic obstructive pulmonary disease and their families: influences on health-related quality of life and hospital admission | 4 | 4 | 4 | 3 – no power calculation data included  | 4 | 4 | 4 | 3 | 3                                                                 | 33/36 |
| <b>Montero (2016)</b>    | Reducing Unplanned Medical Oncology Readmissions by Improving Outpatient Care Transitions: A Process Improvement Project at the Cleveland Clinic                                 | 4 | 4 | 4 | 4 – all admitted patients were eligible | 4 | 4 | 4 | 4 | 3 – relates to previous findings, no recommendations for research | 35/36 |
| <b>Edwards (2014)</b>    | Outcomes Assessment of a Pharmacist-Directed Seamless                                                                                                                            | 3 | 4 | 4 | 3 – sample size justification and       | 3 | 4 | 4 | 4 | 3 – recommendations for future                                    | 28/36 |

|                        |                                                                                                                                                                                           |   |   |                                                                 |                                                                |                                                                      |   |                             |   |                  |       |
|------------------------|-------------------------------------------------------------------------------------------------------------------------------------------------------------------------------------------|---|---|-----------------------------------------------------------------|----------------------------------------------------------------|----------------------------------------------------------------------|---|-----------------------------|---|------------------|-------|
|                        | Care Program in an Ambulatory Oncology Clinic                                                                                                                                             |   |   |                                                                 | response rates not included.                                   |                                                                      |   |                             |   | research missing |       |
| <b>O conner (2016)</b> | Establishing a nurse practitioner model to enhance continuity between palliative care settings.                                                                                           | 4 | 4 | 2 – qualitative is anecdotal, quant methodology not very robust | 3 – sample size justification and response rates not included. | 2 – qual data analysis lacking<br><br>Quant data analysis not robust | 3 | 2                           | 3 | 3                | 26/36 |
| <b>De graff (2016)</b> | Hospice assist at home: does the integration of hospice care in primary healthcare support patients to die in their preferred location – A retrospective cross-sectional evaluation study | 4 | 4 | 3                                                               | 4                                                              | 2                                                                    | 4 | 3                           | 4 | 4                | 32/36 |
| <b>Morris (2017)</b>   | Caring About Residents' Experiences and Symptoms (CARES) Program: A Model of Palliative Care Consultation in the Nursing Home                                                             | 4 | 4 | 3                                                               | 2 – few details given of sample                                | 3                                                                    | 1 | 2 – more information needed | 3 | 3                | 25/36 |
